## CORRESPONDENCE

going "major hepatobiliary or pancreatic surgery" averaging approximately 3.5 h in duration, whereas Scheingraber *et al.*<sup>3</sup> enrolled patients undergoing "lower abdominal gynecologic surgery" averaging approximately 2.25 h. Despite the somewhat shorter duration of surgery, the gynecologic patients randomized to the saline group received a slightly greater total volume<sup>3</sup> ( $71 \pm 14$  ml/kg during the first 120 min of infusion) than the patients receiving saline in the study by McFarlane *et al.*<sup>4</sup> ( $14.6 \pm 41$  ml  $\cdot$  kg<sup>-1</sup>  $\cdot$  h<sup>-1</sup> during an interval of  $219 \pm 77$  min). As a consequence, the increase in plasma chloride and the decrease in plasma bicarbonate were greater in the gynecologic patients. Together, the reports suggest that hyperchloremic acidosis is a dose-dependent consequence of saline administration. Whether this acid-base abnormality is in fact harmful remains unclear, although we<sup>5</sup> were unable to cite any compelling evidence of adverse effects. We are skeptical that differences in outcome, if any, related to the choice of saline or balanced salt solution would justify the cost of a randomized clinical trial.

However, one noteworthy characteristic of Plasmalyte 148, the balanced salt solution used by McFarlane and Lee,<sup>4</sup> is that the sodium concentration is 140 mEq/l. Consequently, in contrast to lactated Ringer's solution, infusion of substantial volumes does not decrease serum sodium and serum osmolality, and does not raise the same theoretical concerns about increases in brain water.<sup>5</sup>

We agree with Story *et al.*<sup>2</sup> that the Stewart approach<sup>6,7</sup> offers interesting insights into acid-base chemistry; however, we disagree that the relative merits of the Stewart approach *versus* the conventional Henderson-Hasselbalch approach constitute a "central issue." Regardless of its attractive biochemical features, the Stewart approach has not yet become popular for routine clinical use, perhaps because it is less simple to quantify at the bedside and because it prompts no important differences in treatment.

Anesthesiology  
2000; 92:627

© 2000 American Society of Anesthesiologists, Inc.  
Lippincott Williams & Wilkins, Inc.

## Dynamic Response to Volatile Anesthetics Has Been Examined Before

*To the Editor:*—Olsen and Dahan describe an analysis of the dynamic electroencephalographic (EEG) response to step changes in end-tidal concentration of isoflurane or sevoflurane. Understanding the dynamic and steady state responses of a system to a changing input is a prerequisite to designing a robust automatic control system. Unfortunately, the use of a single, fixed-size step change in concentration is suboptimal as a "forcing" function for several technical reasons, including (1) the absence within this function of many frequencies in the range of interest, and (2) the possible blinding to nonlinearities. The discipline of control systems engineering provides many better alternatives to the development of a dynamic response measurement of a complex "black box" system similar to an EEG response in a patient. We reported the use of one such technique (pseudorandom binary sequence testing) to measure the dynamic (impulse) response of canine EEG (spectral edge frequency) to volatile anesthetics.<sup>1</sup> This work was later reported in a Ph.D. thesis.<sup>2</sup> Historians of our specialty will also appreciate that Dr. N. T. Smith was administering sine-wave concentrations of agents at various frequencies to human volunteers and measuring EEG response in 1976.<sup>3</sup>

Anesthesiology, V 92, No 2, Feb 2000

**Donald S. Prough, M.D.**

Rebecca Terry White Distinguished Chair  
Department of Anesthesiology  
Dsprough@utmb.edu

**Akhil Bidani, M.D., Ph.D.**

Professor and Chief  
Section on Pulmonary Medicine and Critical Care  
The University of Texas Medical Branch  
Galveston, Texas 77555-0591

### References

1. Drummond GB: Article supports findings of previous comparison. ANESTHESIOLOGY 2000; 92:625
2. Story DA, Liskaser F, Bellomo R: Saline infusion, acidosis and the Stewart approach. ANESTHESIOLOGY 2000; 92:624
3. Scheingraber S, Rehm M, Schmisch C, Finsterer U: Rapid saline infusion produces hyperchloremic acidosis in patients undergoing gynecologic surgery. ANESTHESIOLOGY 1999; 90:1265-70
4. McFarlane C, Lee A: A comparison of Plasmalyte 148 and 0.9% saline for intra-operative fluid replacement. Anaesthesia 1994; 49:779-81
5. Prough DS, Bidani A: Hyperchloremic metabolic acidosis is a predictable consequence of intraoperative infusion of 0.9% saline. ANESTHESIOLOGY 1999;90:1247-9
6. Stewart PA: Modern quantitative acid-base chemistry. Can J Physiol Pharmacol 1983; 61:1444-61
7. Fencel V, Leith DE: Stewart's quantitative acid-base chemistry: Applications in biology and medicine. Respir Physiol 1993; 91:1-16

(Accepted for publication September 23, 1999.)

**Ira J. Rampil, M.S.E.E., M.D.**

Department of Anesthesia  
University of California at San Francisco  
521 Parnassus, Room C450  
San Francisco, California 94143-0648  
rampili@anesthesia.ucsf.edu

### References

1. Rampil IJ, Sasse FJ, Smith NT, Hoff BH, Rusy BF, Flemming DC: A new method for testing the response to an inhalational agent (abstract). ANESTHESIOLOGY 1979; 51:S26
2. Schils GF: A study of Servo-anesthesia (OCLC no. 10152108). Madison, University of Wisconsin, 1983
3. Nuñez P: Electric Fields of the Brain. New York, Oxford University Press, 1981, pp 233

(Accepted for publication September 23, 1999.)
